# Supplementary material for: Using vertical phase differences to better resolve 3D gravity wave structure
Source: Copernicus journal article supplement (doi:10.5194/amt-14-5873-2021), 2021-08-31
Supplement: Supplementary file 1 [file amt-14-5873-2021-supplement.zip › amt-14-5873-2021-supplement-title-page.pdf]

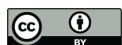

*Supplement of*

## **Using vertical phase differences to better resolve 3D gravity wave structure**

**Corwin J. Wright et al.**

*Correspondence to:* Corwin J. Wright (c.wright@bath.ac.uk)

- amt-14-5873-2021-supplement-title-page.pdf
- Figure\_S1.png

The copyright of individual parts of the supplement might differ from the article licence.
