# Supplementary figures and images for: Using vertical phase differences to better resolve 3D gravity wave structure
Source: Copernicus journal article supplement (doi:10.5194/amt-14-5873-2021), 2021-08-31

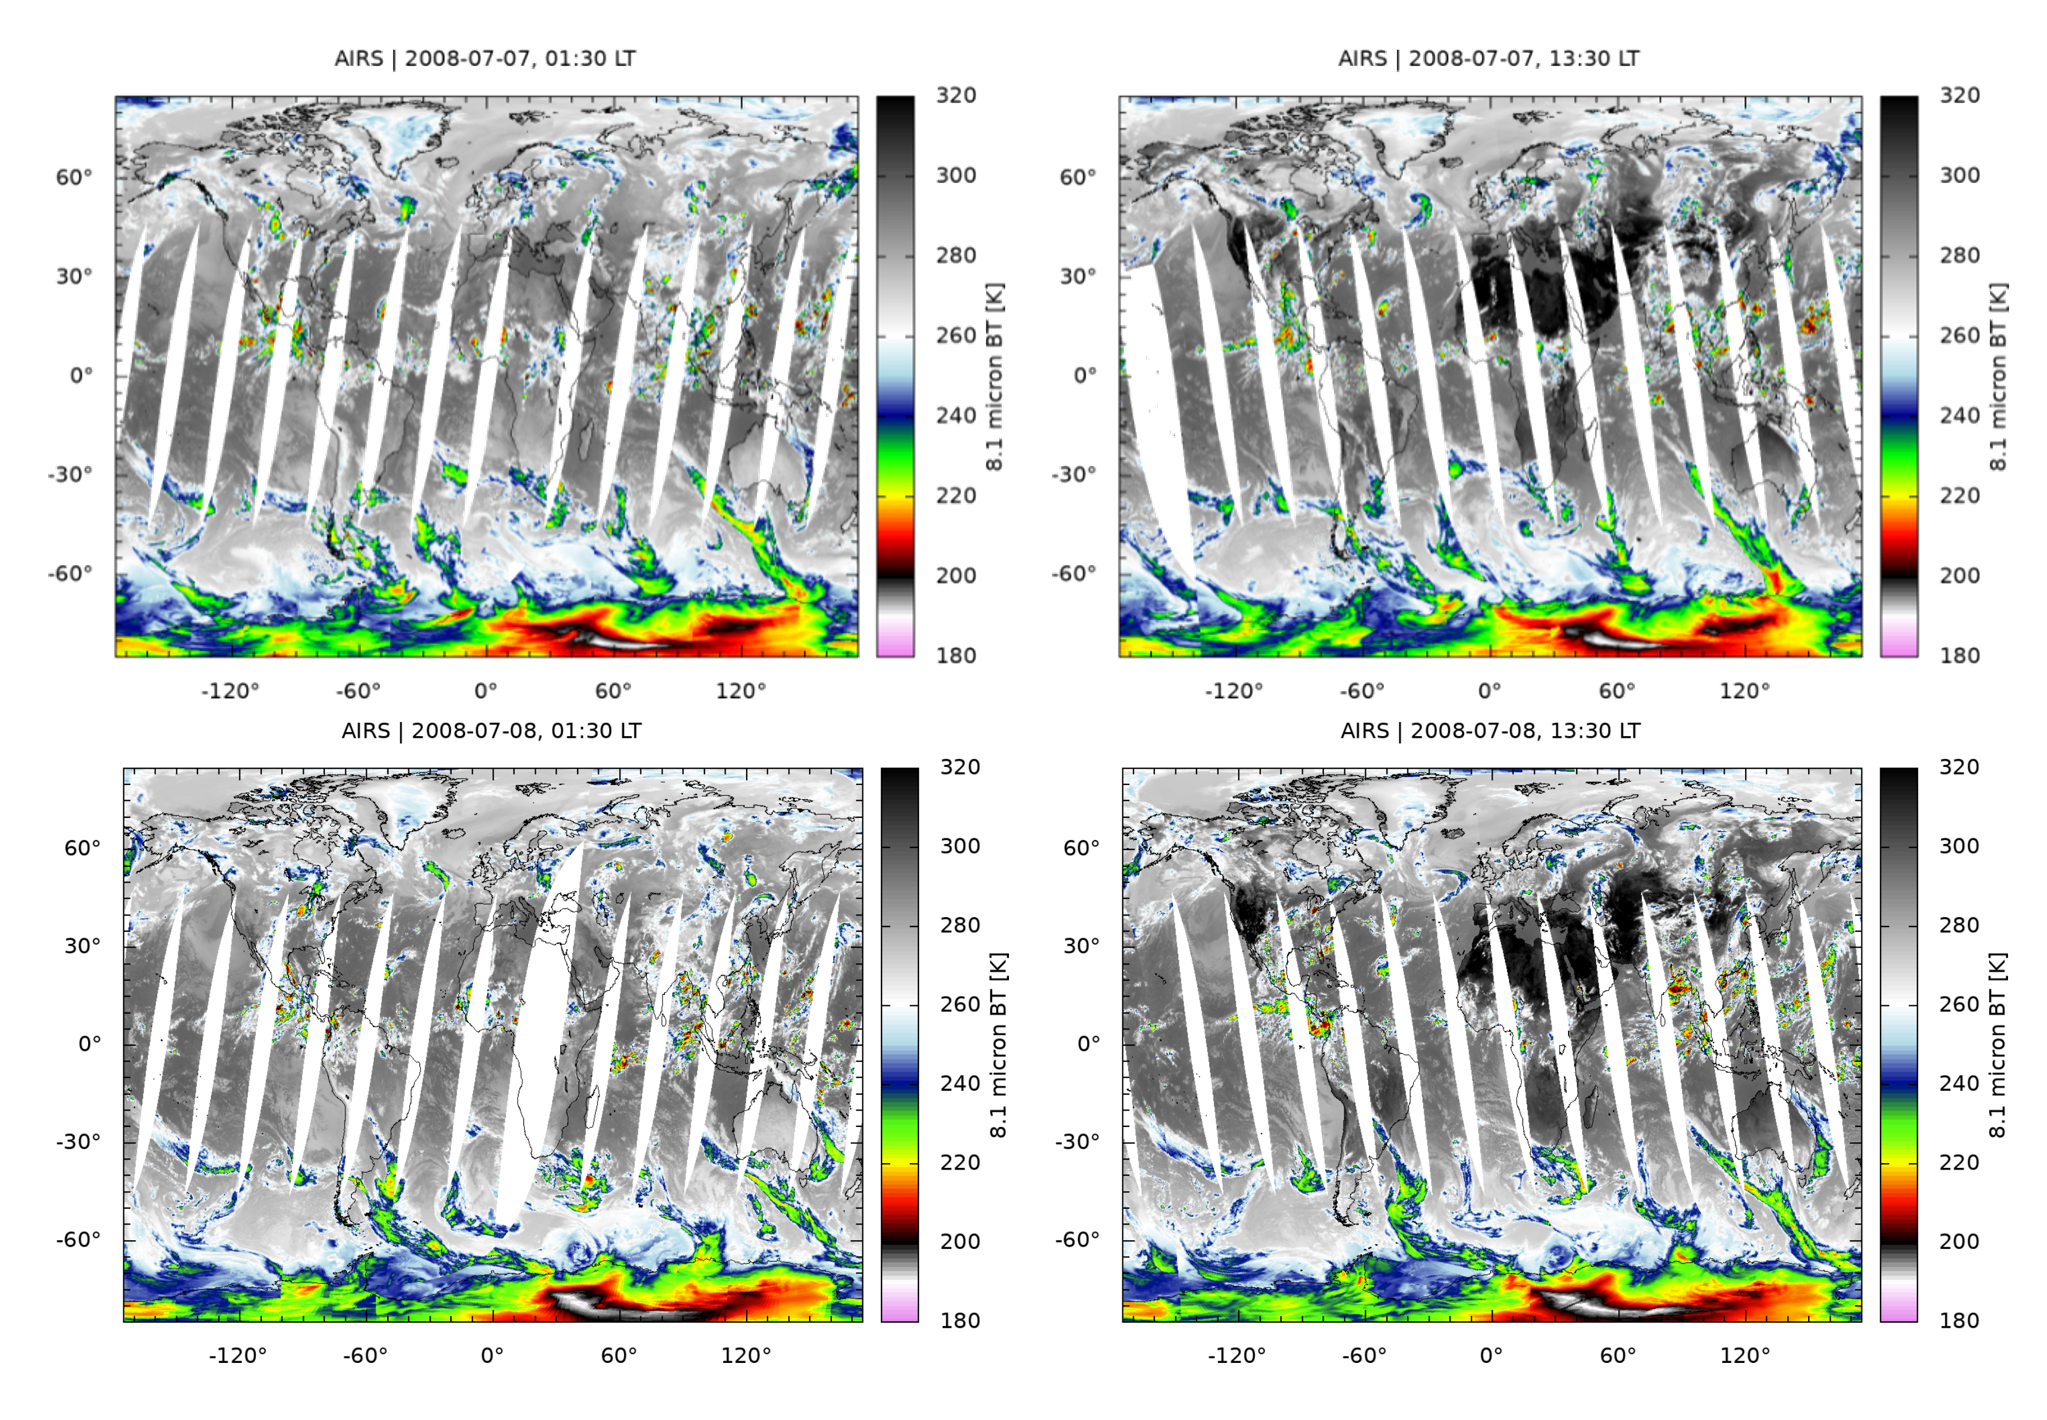

Supplement: Supplementary file 1 [file amt-14-5873-2021-supplement.zip › Figure_S1.png]
